# Supplementary material
Source: HighWire-hosted journal article supplement (https://tobaccocontrol.bmj.com/highwire/filestream/166069/field_highwire_adjunct_files/0/tc-2022-057777supp001_data_supplement.pdf)
Supplement: tc-2022-057777supp001_data_supplement.pdf [file tc-2022-057777supp001_data_supplement.pdf]

## SUPPLEMENTARY FILES

### List of Supplementary Tables and Figures

|                                                                                                                                                                                                                                                                 |   |
|-----------------------------------------------------------------------------------------------------------------------------------------------------------------------------------------------------------------------------------------------------------------|---|
| Supplementary Table 1 - Hazard ratios showing the relative differences in the likelihood of transitioning from three nicotine-product use states by age, ethnicity, income, and sex. ....                                                                       | 2 |
| Supplementary Table 2 - Adjusted transition probabilities showing the likelihood of transitioning between five nicotine-product use state estimated over four model iterations (equivalent to four years). ....                                                 | 3 |
| Supplementary Figure 1 – Comparison of transition probabilities by observation year (two-wave subsection) to test the time homogeneity of transition probabilities.....                                                                                         | 4 |
| Supplementary Figure 2 - Comparison of transition probabilities from the main analyses (six waves of data, waves 7-12) and the sensitivity analyses that excluded wave 7 (four waves of data, waves 8-12).....                                                  | 4 |
| Supplementary Figure 3 – Comparison of transition probabilities from the main analyses (all six waves of data) and the sensitivity analyses that excluded transitions that occurred during COVID-19 restrictions (March 2020 – July 2021).....                  | 5 |
| Supplementary Figure 4 – Comparison of transition probabilities from the main analyses (all six waves of data) and the sensitivity analyses that excluded participants whose baseline nicotine product use status was assumed to be ‘non-current’ (n=800). .... | 5 |

Supplementary Table 1 - Hazard ratios showing the relative differences in the likelihood of transitioning from three nicotine-product use states by age, ethnicity, income, and sex.

| Covariate              | From: Never          |                      | From: E-cigarettes   |                      | From: Smoking        |                      | From: Non-current    |                      |
|------------------------|----------------------|----------------------|----------------------|----------------------|----------------------|----------------------|----------------------|----------------------|
|                        | To: e-cigs           | To: smoking          | To: non-current      | To: smoking          | To: non-current      | To: e-cigs           | To: smoking          |                      |
|                        | HR (95% CI)          |                      |                      |
| <b>Age (years)</b>     |                      |                      |                      |                      |                      |                      |                      |                      |
| 10-13                  | 0.36<br>(0.3, 0.43)  | 0.69<br>(0.52, 0.92) | 0.38<br>(0.24, 0.59) | 0.58<br>(0.3, 1.13)  | 1.28<br>(0.89, 1.84) | 0.28<br>(0.11, 0.75) | 0.21<br>(0.08, 0.55) | 1.02<br>(0.54, 1.94) |
| 14-17<br>(ref)         | 1.00                 | 1.00                 | 1.00                 | 1.00                 | 1.00                 | 1.00                 | 1.00                 | 1.00                 |
| 18-21                  | 0.67<br>(0.56, 0.8)  | 0.56<br>(0.39, 0.79) | 1.2<br>(0.96, 1.5)   | 0.65<br>(0.45, 0.93) | 0.53<br>(0.39, 0.72) | 0.48<br>(0.34, 0.68) | 0.68<br>(0.52, 0.89) | 0.61<br>(0.42, 0.89) |
| 22-25                  | 0.42<br>(0.33, 0.53) | 0.11<br>(0.04, 0.28) | 1.12<br>(0.87, 1.45) | 0.6<br>(0.39, 0.91)  | 0.38<br>(0.27, 0.53) | 0.44<br>(0.31, 0.63) | 0.5<br>(0.38, 0.67)  | 0.52<br>(0.35, 0.77) |
| <b>Ethnicity</b>       |                      |                      |                      |                      |                      |                      |                      |                      |
| Minority<br>(vs White) | 0.54<br>(0.43, 0.68) | 0.74<br>(0.53, 1.03) | 1.12<br>(0.82, 1.51) | 1.01<br>(0.58, 1.74) | 1.69<br>(1.23, 2.32) | 1.23<br>(0.76, 2.01) | 0.43<br>(0.29, 0.62) | 0.61<br>(0.39, 0.96) |
| <b>Income</b>          |                      |                      |                      |                      |                      |                      |                      |                      |
| Low (ref)              | 1.00                 | 1.00                 | 1.00                 | 1.00                 | 1.00                 | 1.00                 | 1.00                 | 1.00                 |
| Mid                    | 1.03<br>(0.87, 1.21) | 0.64<br>(0.48, 0.85) | 0.94<br>(0.74, 1.18) | 1.27<br>(0.86, 1.88) | 1.33<br>(0.99, 1.78) | 1.88<br>(1.3, 2.72)  | 0.88<br>(0.67, 1.16) | 1.15<br>(0.81, 1.62) |
| High                   | 1.06<br>(0.89, 1.26) | 0.65<br>(0.48, 0.88) | 0.78<br>(0.61, 0.99) | 1.21<br>(0.81, 1.82) | 1.81<br>(1.35, 2.44) | 2.47<br>(1.7, 3.6)   | 0.99<br>(0.76, 1.28) | 1.03<br>(0.71, 1.5)  |
| <b>Sex</b>             |                      |                      |                      |                      |                      |                      |                      |                      |
| Female<br>(vs Male)    | 0.91<br>(0.79, 1.04) | 1.44<br>(1.13, 1.85) | 1.38<br>(1.14, 1.66) | 0.77<br>(0.56, 1.06) | 1.07<br>(0.84, 1.36) | 1.18<br>(0.88, 1.58) | 0.67<br>(0.53, 0.83) | 1.53<br>(1.12, 2.11) |

Supplementary Table 2 - Adjusted transition probabilities showing the likelihood of transitioning between five nicotine-product use state estimated over four model iterations (equivalent to four years).

|                                | <b>Year 1</b> | <b>Year 2</b> | <b>Year 3</b> | <b>Year 4</b> | <b>Year 5</b> |
|--------------------------------|---------------|---------------|---------------|---------------|---------------|
|                                | % (95% CI)    |
| <b>From: Smoking</b>           |               |               |               |               |               |
| To: Smoking                    | 74 (72, 75)   | 57 (55, 59)   | 47 (44, 49)   | 40 (38, 42)   | 36 (34, 38)   |
| To: E-cigarettes only          | 11 (10, 12)   | 16 (15, 18)   | 19 (18, 21)   | 21 (19, 22)   | 21 (20, 23)   |
| To: Non-current                | 15 (14, 17)   | 26 (25, 28)   | 34 (32, 36)   | 39 (37, 42)   | 43 (41, 45)   |
| To: Never                      | 0 (0, 0)      | 0 (0, 0)      | 0 (0, 0)      | 0 (0, 0)      | 0 (0, 0)      |
| <b>From: E-cigarettes only</b> |               |               |               |               |               |
| To: Smoking                    | 14 (13, 16)   | 21 (19, 23)   | 25 (23, 27)   | 26 (24, 28)   | 27 (25, 29)   |
| To: E-cigarettes only          | 59 (57, 61)   | 40 (37, 42)   | 30 (28, 32)   | 26 (24, 28)   | 24 (23, 26)   |
| To: Non-current                | 27 (25, 29)   | 39 (37, 41)   | 45 (43, 47)   | 48 (46, 50)   | 49 (47, 51)   |
| To: Never                      | 0 (0, 0)      | 0 (0, 0)      | 0 (0, 0)      | 0 (0, 0)      | 0 (0, 0)      |
| <b>From: Non-current</b>       |               |               |               |               |               |
| To: Smoking                    | 8 (7, 9)      | 14 (13, 16)   | 19 (17, 20)   | 22 (20, 24)   | 24 (22, 26)   |
| To: E-cigarettes only          | 12 (11, 13)   | 18 (16, 19)   | 20 (19, 22)   | 21 (20, 23)   | 22 (20, 24)   |
| To: Non-current                | 80 (78, 81)   | 68 (66, 70)   | 61 (59, 63)   | 57 (55, 59)   | 54 (52, 56)   |
| To: Never                      | 0 (0, 0)      | 0 (0, 0)      | 0 (0, 0)      | 0 (0, 0)      | 0 (0, 0)      |
| <b>From: Never</b>             |               |               |               |               |               |
| To: Smoking                    | 2 (2, 2)      | 4 (4, 5)      | 6 (6, 7)      | 8 (7, 9)      | 10 (9, 10)    |
| To: E-cigarettes only          | 4 (4, 4)      | 6 (6, 7)      | 8 (8, 9)      | 9 (9, 10)     | 10 (10, 11)   |
| To: Non-current                | 1 (1, 1)      | 3 (3, 3)      | 6 (5, 6)      | 8 (8, 9)      | 11 (10, 12)   |
| To: Never                      | 93 (93, 93)   | 86 (86, 87)   | 80 (79, 81)   | 75 (73, 76)   | 69 (68, 71)   |

Note: Smoking includes both 'dual-use' and 'cigarette only' states.

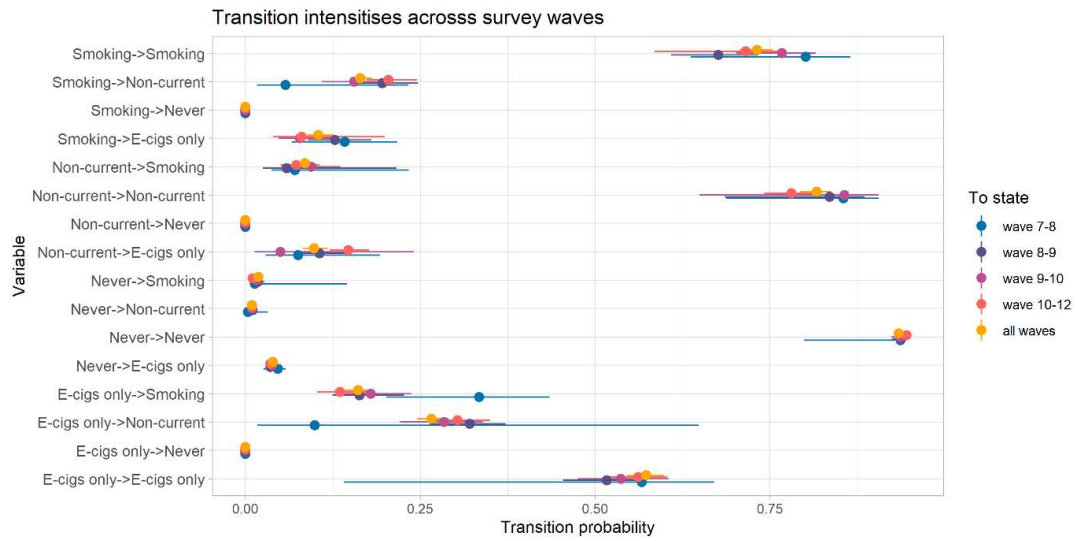

Supplementary Figure 1 – Comparison of transition probabilities by observation year (two-wave subsection) to test the time homogeneity of transition probabilities

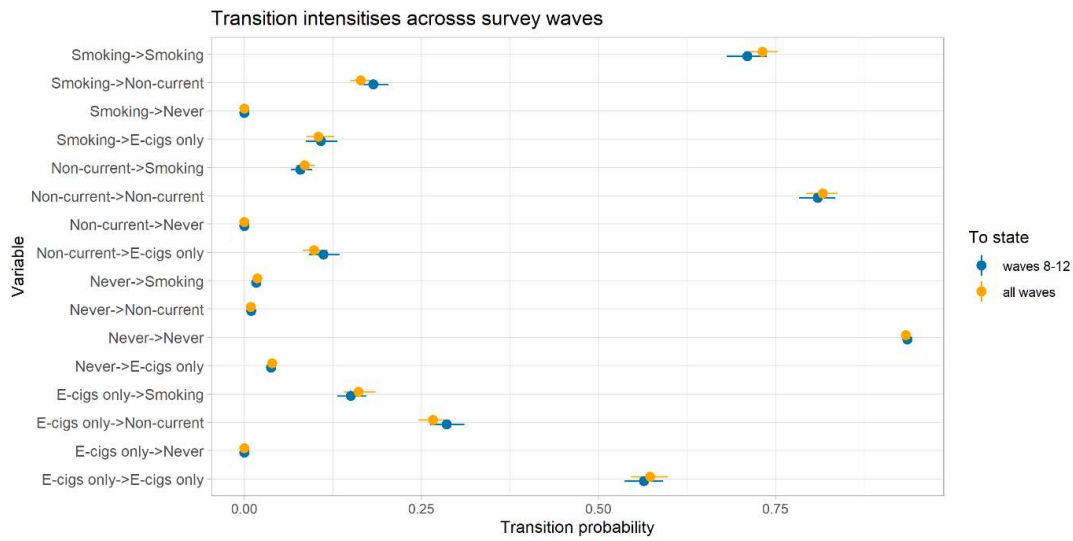

Supplementary Figure 2 - Comparison of transition probabilities from the main analyses (six waves of data, waves 7-12) and the sensitivity analyses that excluded wave 7 (four waves of data, waves 8-12)

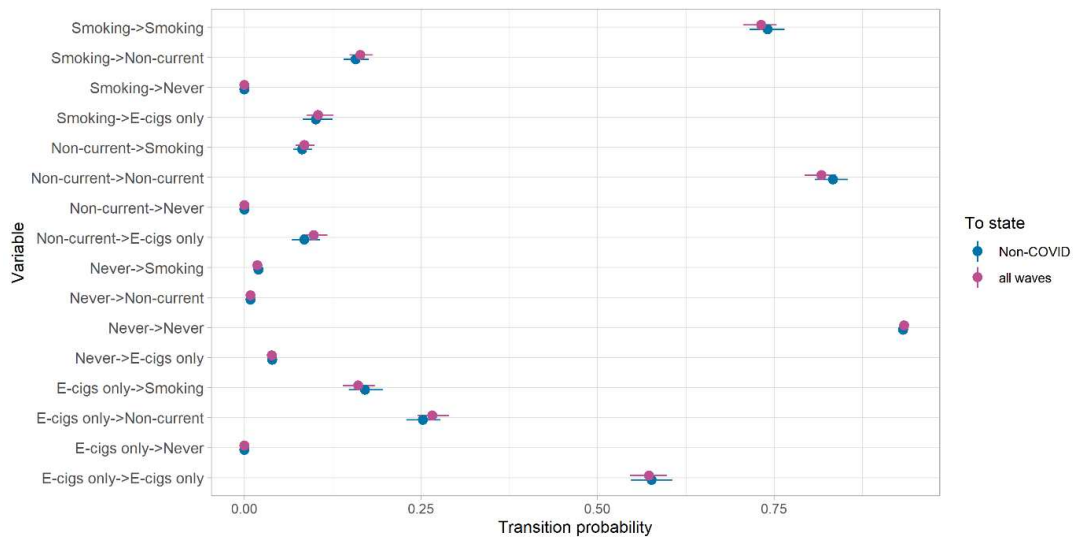

Supplementary Figure 3 – Comparison of transition probabilities from the main analyses (all six waves of data) and the sensitivity analyses that excluded transitions that occurred during COVID-19 restrictions (March 2020 – July 2021)

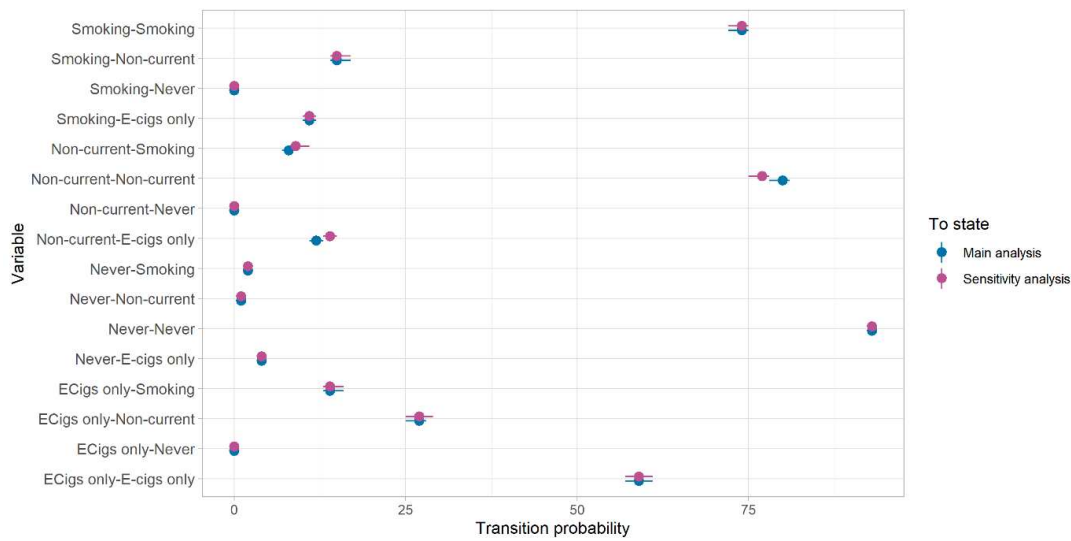

Supplementary Figure 4 – Comparison of transition probabilities from the main analyses (all six waves of data) and the sensitivity analyses that excluded participants whose baseline nicotine product use status was assumed to be 'non-current' (n=800).
